# Supplementary material for: The Role of Flexibility and Conformational Selection in the Binding Promiscuity of PDZ Domains
Source: PubMed Central journal article supplement (PMC3486844; doi:10.1371/journal.pcbi.1002749), 2012-11-01

Supporting Information Figure S1 for Münz et al.

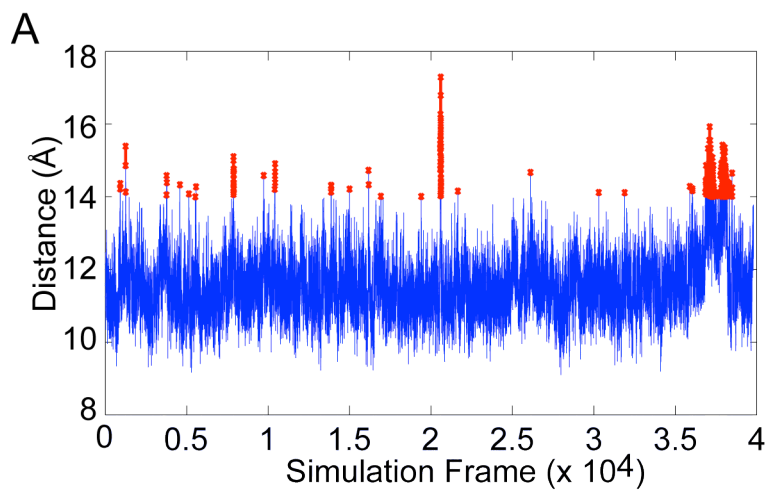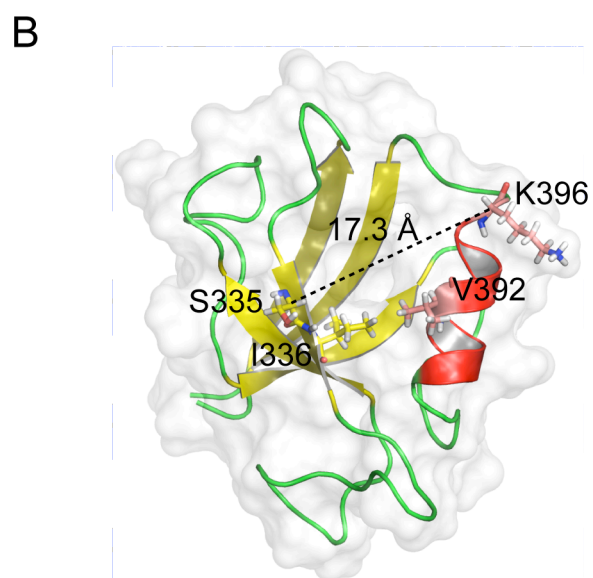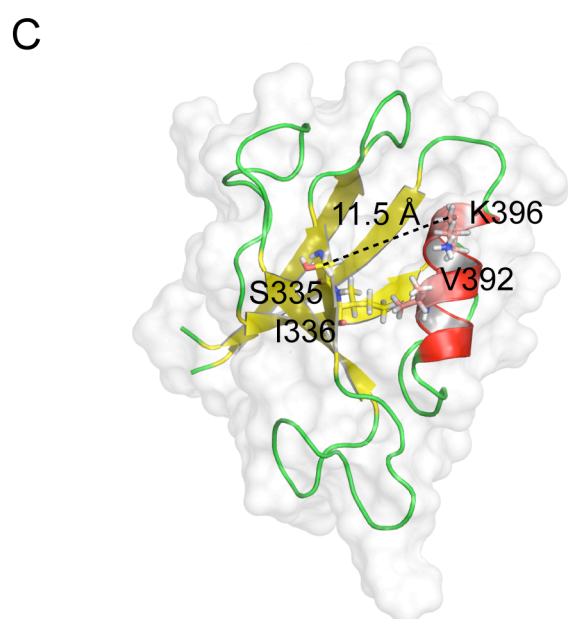

Supplement: pcbi.1002749.s001.pdf [file pcbi.1002749.s001.pdf]
