# Supplementary material for: The Role of Flexibility and Conformational Selection in the Binding Promiscuity of PDZ Domains
Source: PLOS journal article supplement (doi:10.1371/journal.pcbi.1002749), 2012-11-01
Supplement: S3 (10.1371/journal.pcbi.1002749.s003) [file journal.pcbi.1002749.s003]

301 Moved Permanently

# Moved Permanently

The document has moved here.

---

Apache Server at www.ploscompbiol.org Port 80
